# Supplementary material
Source: bioRxiv or medRxiv preprint supplement (https://medrxiv.org/highwire/filestream/84233/field_highwire_adjunct_files/0/2020.03.23.20039446-1.pdf)
Supplement: Supplementary file [file 2020.03.23.20039446-1.pdf]

## **Aerosol and Surface Transmission Potential of SARS-CoV-2**

**Authors:** Joshua L. Santarpia<sup>1,2\*</sup>, Danielle N. Rivera<sup>2</sup>, Vicki L. Herrera<sup>1</sup>, M. Jane Morwitzer<sup>1</sup>, Hannah M. Creager<sup>1</sup>, George W. Santarpia<sup>1</sup>, Kevin K. Crown<sup>2</sup>, David M. Brett-Major<sup>1</sup>, Elizabeth R. Schnaubelt<sup>1,3</sup>, M. Jana Broadhurst<sup>1</sup>, James V. Lawler<sup>1,2</sup>, St. Patrick Reid<sup>1</sup>, and John J. Lowe<sup>1,2</sup>

### **Affiliations:**

<sup>1</sup>University of Nebraska Medical Center

<sup>2</sup>National Strategic Research Institute

<sup>3</sup>United States Air Force School of Aerospace Medicine

## **Supplementary Information**

| Room             | Day | Bedside Table or Bed Rail (copies/μL) |             | Air Handling Grate (copies/μL) |             | Floor Under Bed (copies/μL) |             | Room Window Ledge (copies/μL) |             | Misc. Personal Items (copies/μL) |               |             | Phones (copies/μL) |             | Remote (copies/μL) |             | Toilet (copies/μL) |             | Air Samples (gc/L of air) |             | Samples Collected | % Positive | Oral Temp. (°F) | Other Sym?        |      |      |
|------------------|-----|---------------------------------------|-------------|--------------------------------|-------------|-----------------------------|-------------|-------------------------------|-------------|----------------------------------|---------------|-------------|--------------------|-------------|--------------------|-------------|--------------------|-------------|---------------------------|-------------|-------------------|------------|-----------------|-------------------|------|------|
|                  |     | Average                               | Stand. Dev. | Average                        | Stand. Dev. | Average                     | Stand. Dev. | Average                       | Stand. Dev. | Description                      | Average       | Stand. Dev. | Average            | Stand. Dev. | Average            | Stand. Dev. | Average            | Stand. Dev. | Average                   | Stand. Dev. |                   |            |                 |                   |      |      |
| NQU A            | 5   | 1.31                                  | 0.11        | UND                            | NC          | UND                         | NC          | 0.04                          | 0.28        | Exercise Bike                    | UND           | NC          | 0.14               | 0.24        | 0.12               | 0.21        | 0.95               | 0.39        | 4.00                      | 6.93        | 6                 | 100.0%     | 102.3           | Y                 |      |      |
| NQU B            | 5   | UND                                   | NC          |                                |             |                             |             | 0.23                          | 0.40        |                                  | 0.35          | 0.33        | UND                | NC          | UND                | NC          | UND                | NC          | UND                       | NC          | 2.79              | 4.84       | 6               | 50.0%             | 98.2 | Y    |
| NQU C            | 5   | UND                                   | NC          |                                |             |                             |             | 0.25                          | 0.43        |                                  | 0.15          | 0.25        | 0.22               | 0.20        | 0.28               | 0.48        | 8.34               | 7.25        | 6                         | 83.3%       | 99.1              | N          |                 |                   |      |      |
| NQU E            | 6   | 0.12                                  | 0.20        |                                |             |                             |             | 0.21                          | 0.36        |                                  | UND           | NC          | 0.41               | 0.12        | 0.11               | 0.20        | 2.70               | 4.68        | 6                         | 83.3%       | 100.5             | Y          |                 |                   |      |      |
| NQU F            | 6   | 0.31                                  | 0.27        |                                |             |                             |             | UND                           | NC          |                                  | 0.41          | 0.21        | UND                | NC          | 0.53               | 0.24        | UND                | NC          | 5                         | 60.0%       | 98.6              | Y          |                 |                   |      |      |
| NQU G            | 6   | UND                                   | NC          |                                |             |                             |             | UND                           | NC          |                                  | 0.32          | 0.30        | UND                | NC          | 0.41               | 0.10        |                    |             | 5                         | 40.0%       | 99.1              | N          |                 |                   |      |      |
| NQU H            | 7   | 0.16                                  | 0.27        |                                |             |                             |             | 0.20                          | 0.35        |                                  | UND           | NC          | 0.28               | 0.25        | 0.39               | 0.38        | 3.30               | 5.72        | 6                         | 83.3%       | 98.5              | Y          |                 |                   |      |      |
| NQU I            | 7   | 0.20                                  | 0.35        |                                |             |                             |             | 0.13                          | 0.22        |                                  | UND           | NC          | UND                | NC          | 0.25               | 0.21        | 8.22               | 8.27        | 5                         | 80.0%       | 99.1              | N          |                 |                   |      |      |
| NQU A            | 8   | 0.20                                  | 0.34        |                                |             |                             |             | 0.39                          | 0.41        |                                  | Exercise Bike | UND         | NC                 | 0.46        | 0.40               | 0.44        | 0.41               | UND         | NC                        | 4.74        | 4.13              | 7          | 71.4%           | 100.4             | Y    |      |
| NQU B            | 8   | 0.31                                  | 0.33        |                                |             |                             |             | 0.25                          | 0.23        |                                  | Hot Pot       | 0.18        | 0.30               | 0.13        | 0.23               | UND         | NC                 | 0.29        | 0.25                      | UND         | NC                | 7          | 71.4%           | 97.9              | N    |      |
| NQU C            | 8   | 0.08                                  | 0.14        |                                |             |                             |             | UND                           | NC          |                                  | Hot Pot       | 0.42        | 0.36               | 0.10        | 0.17               | UND         | NC                 | 0.11        | 0.18                      | 5.68        | 9.85              | 7          | 71.4%           | 99.5              | N    |      |
| NQU D            | 9   | 0.19                                  | 0.33        |                                |             |                             |             | 0.17                          | 0.30        |                                  | iPad          | 0.10        | 0.17               | 0.15        | 0.25               | UND         | NC                 | 0.55        | 0.18                      | UND         | NC                | 7          | 71.4%           | ND                | ND   |      |
| NQU E            | 9   | UND                                   | NC          |                                |             |                             |             | UND                           | NC          |                                  | UND           | NC          | 0.28               | 0.32        | 0.25               | 0.22        | 0.22               | 0.20        | UND                       | NC          | 6                 | 50.0%      | 99              | Y                 |      |      |
| NQU F            | 9   | UND                                   | NC          |                                |             |                             |             | 0.15                          | 0.26        |                                  |               |             | 0.12               | 0.20        | UND                | NC          | 0.09               | 0.16        | UND                       | NC          | 6                 | 50.0%      | 98.8            | Y                 |      |      |
| NQU G            | 9   | 0.46                                  | 0.40        |                                |             |                             |             | UND                           | NC          |                                  |               |             | 0.19               | 0.33        | 0.18               | 0.31        | 0.14               | 0.25        | UND                       | NC          | 6                 | 66.7%      | 99.1            | N                 |      |      |
| NQU H            | 9   | 0.58                                  | 0.24        |                                |             |                             |             | 0.67                          | 0.32        |                                  | Dumb bells    | UND         | NC                 | UND         | NC                 | UND         | NC                 | 0.43        | 0.12                      | 4.22        | 7.31              | 9          | 66.7%           | 98.7              | N    |      |
|                  |     |                                       |             |                                |             |                             |             |                               |             |                                  | Treadmill     | 0.20        | 0.34               |             |                    |             |                    |             |                           |             |                   |            |                 |                   |      |      |
|                  |     |                                       |             | Yoga Mat                       | 0.16        | 0.27                        |             |                               |             |                                  |               |             |                    |             |                    |             |                    |             |                           |             |                   |            |                 |                   |      |      |
| NQU I            | 9   | 0.09                                  | 0.16        | 0.14                           | 0.24        | iPad                        | 0.43        | 0.42                          | 0.14        | 0.24                             | 0.17          | 0.29        | 0.20               | 0.35        | UND                | NC          | 7                  | 85.7%       | 98.5                      | N           |                   |            |                 |                   |      |      |
| NBU A Patient 1  | 10  | UND                                   | NC          | UND                            | NC          | 0.39                        | 0.38        | 0.14                          | 0.24        | Spirometer                       | 0.34          | 0.38        | UND                | NC          | 1.70               | 0.24        | UND                | NC          | >6ft from patient         | 16          | 68.8%             | 98.3       | Y               |                   |      |      |
|                  |     | 0.23                                  | 0.21        | 0.20                           | 0.34        | 0.21                        | 0.37        | UND                           | NC          | Spirometer                       | UND           | NC          |                    |             |                    |             |                    |             |                           |             |                   |            |                 |                   |      |      |
|                  |     | 0.11                                  | 0.19        | UND                            | NC          | O2 Cannula                  | 0.15        | 0.26                          |             |                                  |               |             |                    |             |                    |             |                    |             |                           |             |                   |            |                 |                   |      |      |
| NBU B Patient 2  | 10  | 0.33                                  | 0.31        | 0.44                           | 0.44        | 0.41                        | 0.46        | 0.36                          | 0.33        | Laptop                           | 0.19          | 0.18        | 0.13               | 0.23        | UND                | NC          | 0.21               | 0.37        | UND                       | NC          | >6ft from patient | 15         | 86.7%           | 99.2              | Y    |      |
|                  |     | 0.14                                  | 0.25        |                                |             |                             |             |                               |             | Glasses                          | 0.22          | 0.38        |                    |             |                    |             |                    |             |                           |             |                   |            |                 |                   |      |      |
|                  |     | UND                                   | NC          |                                |             |                             |             |                               |             | 1.75                             | 0.33          | 1.02        |                    |             |                    |             |                    |             |                           |             |                   |            |                 |                   |      | 0.32 |
| NBU B Patient 3  | 18  | 1.32                                  | 0.24        | 1.71                           | 0.08        | 0.20                        | 0.34        | 0.48                          | 0.44        | Lotion tube                      | 0.32          | 0.55        | UND                | NC          | 0.23               | 0.20        | UND                | NC          | Near Patient              | 9           | 88.9%             | 99.1       | Y               |                   |      |      |
|                  |     |                                       |             |                                |             |                             |             |                               |             |                                  |               |             |                    |             |                    |             |                    |             |                           |             |                   |            |                 | 4.07              | 7.06 |      |
|                  |     |                                       |             |                                |             |                             |             |                               |             |                                  |               |             |                    |             |                    |             |                    |             |                           |             |                   |            |                 | >6ft from patient | 2.48 | 4.30 |
| Percent Positive |     | 70.8%                                 |             | 80.0%                          |             | 100.0%                      |             | 72.7%                         |             | 75.0%                            |               | 77.8%       |                    | 55.6%       |                    | 81.0%       |                    | 63.2%       |                           |             |                   | 57.9%      | 57.9%           |                   |      |      |
| p to Fever       |     | 0.15                                  |             |                                |             |                             |             | 0.25                          |             | -0.07                            |               | -0.02       |                    | 0.23        |                    | 0.02        |                    | 0.36        |                           | 0.39        |                   |            |                 |                   |      |      |

**Table S1. Results of all in-room samples collected in this study.** UND denotes undetected, NC denotes Not Calculated. ND denotes No Data. The dotted background indicates the sample from which cell culture data is shown in Figure 2. In the case where no data was obtained, the patient had been transferred from another facility less than 24 hours prior to sampling.

| Location         | Day | Hallway Air Samples<br>(copies/L of air) |       | Personal Air Samples<br>(copies/L of air) |       |
|------------------|-----|------------------------------------------|-------|-------------------------------------------|-------|
| NQU              | 5   | UND                                      | NC    |                                           |       |
|                  | 5   | UND                                      | NC    |                                           |       |
|                  | 6   | 5.76                                     | 5.10  |                                           |       |
|                  | 6   | 6.00                                     | 5.90  |                                           |       |
|                  | 7   | 2.08                                     | 3.60  |                                           |       |
|                  | 7   | UND                                      | NC    |                                           |       |
|                  | 8   | 8.69                                     | 3.69  |                                           |       |
|                  | 8   | 2.36                                     | 4.09  |                                           |       |
|                  | 8   | 2.29                                     | 3.97  |                                           |       |
|                  | 9   |                                          |       | 7.39                                      | 19.20 |
|                  |     |                                          | 5.37  | 7.15                                      |       |
| NBU              | 10  | UND                                      | NC    |                                           |       |
|                  | 10  | 2.99                                     | 5.19  |                                           |       |
|                  | 10  | UND                                      | NC    |                                           |       |
|                  | 18  |                                          |       | 19.17                                     | 49.82 |
|                  |     |                                          | 48.22 | 67.16                                     |       |
| Percent Positive |     | 58.3%                                    |       | 100.0%                                    |       |

**Table S2. Results of hallway air samples and personal air samples.** UND denotes undetected, NC denotes Not Calculated. The dotted background indicates the sample from which cell culture data is shown in Figure 2.
